# Supplementary material for: Enhanced stability and ultrahigh activity of amorphous ripple nanostructured Ni-doped Fe oxyhydroxide electrode toward synergetic electrocatalytic water splitting
Source: Royal Society of Chemistry journal article supplement (doi:10.1039/d0ra04828c), 2020-01-01
Supplement: d0ra04828c2.pdf [file d0ra04828c2.pdf]

## Supporting Information

**Enhanced stability and ultrahigh activity of amorphous ripple nanostructured Ni-doped Fe oxyhydroxide electrode toward synergetic electrocatalytic water splitting**

**Selvam Mathi and Jayaraman Jayabharathi \***

*Department of Chemistry, Material Science Lab, Annamalai University, Annamalainagar, Tamilnadu- 608 002, India: Email- jtchalam2005@yahoo.co.in*

**Figure S1. FESEM –EDS image of Ni@Fe-NP. A) FESEM; B) Fe, C) O; D) Ni; E) overlap of Fe, Ni and OEDS signals and F) EDS spectrum.**

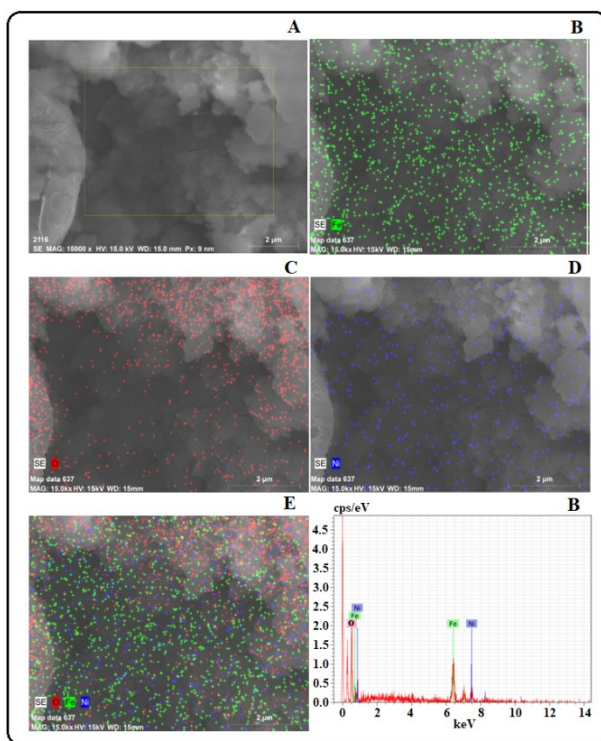

Figure S2. BET Specific surface area characterization of A) Ni<sub>7</sub>@Fe<sub>3</sub>-NP; B) Ni<sub>5</sub>@Fe<sub>5</sub>-NP; C) Ni<sub>3</sub>@Fe<sub>7</sub>-NP.

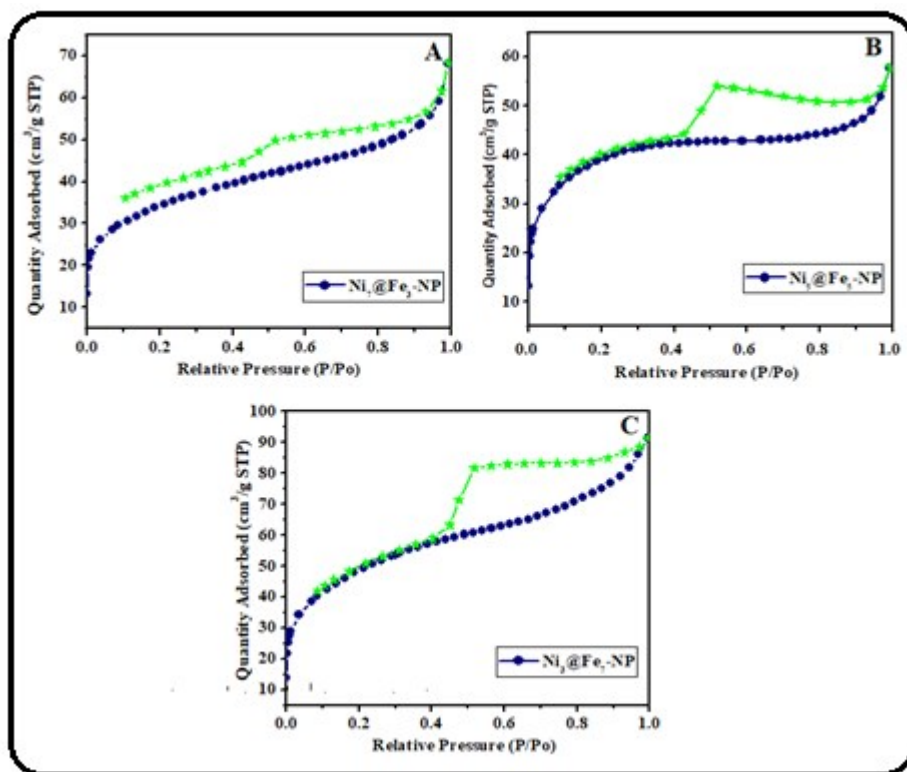

FigureS3. A) EDS-HAADF elemental image; B) EDS line scanning analysis spectra and C) Elemental analysis spectra of Ni@Fe-NP.

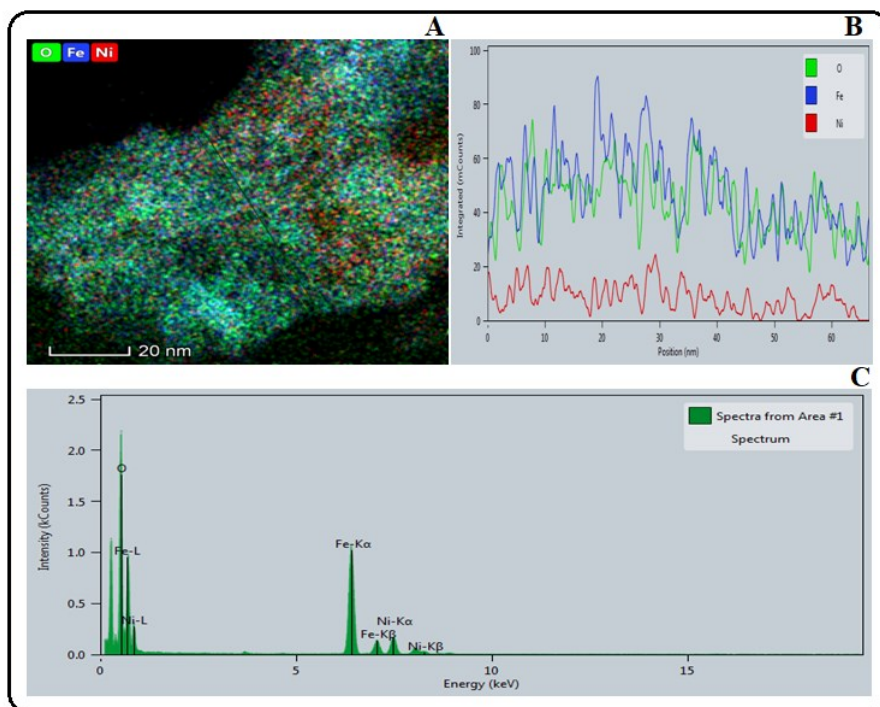

Figure S4.A) Chronopotentiometric durability test at current density  $10 \text{ mA cm}^{-2}$  for 130 h;  
B) Morphology of the catalyst after long-term stability test.

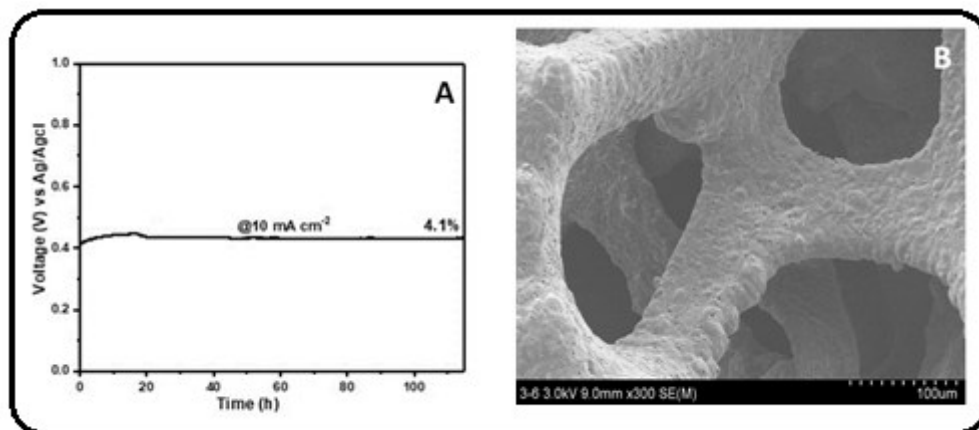

Figure S5. Solar panel current-voltage (I-V) curve under the light illumination (1 sun).

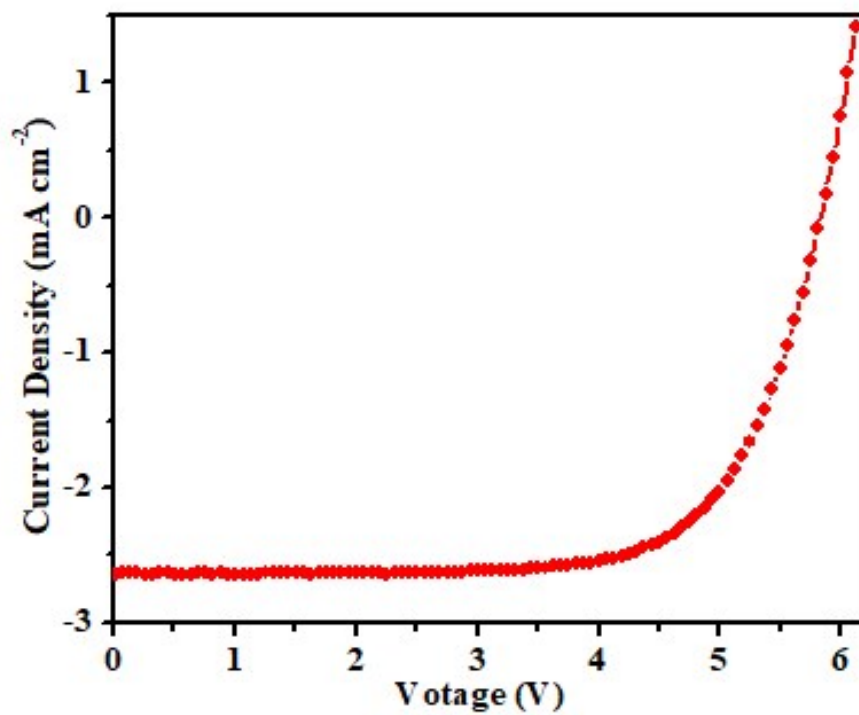

Figure S6. Nyquist plots for different catalysts prepared at different ratio of Ni doped FeOH-NP.

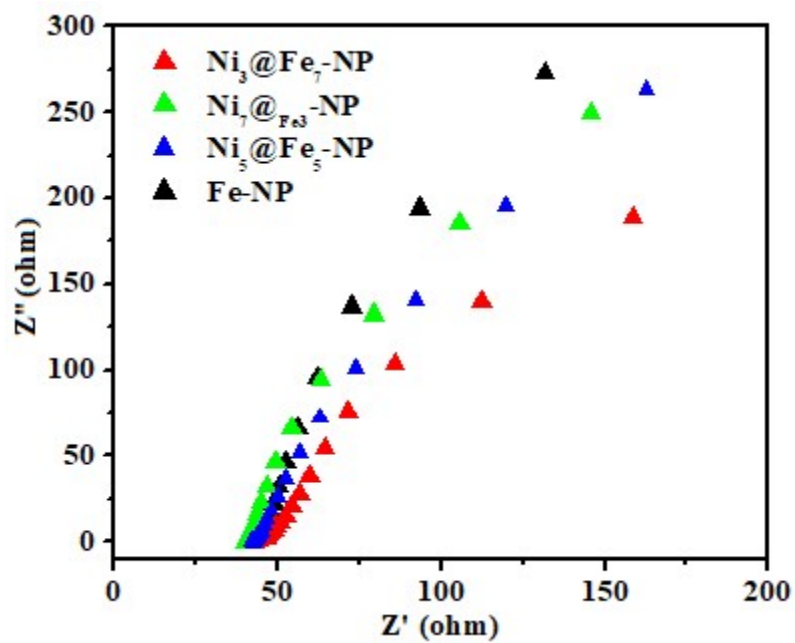

**Figure S7 Digital image of conventional water electrolyzer during full cell water electrolysis**  
 **$\text{Ni}_3\text{@Fe}_7\text{-NP/Ni F}$  anode and 20%Pt/C/Ni F cathode.**

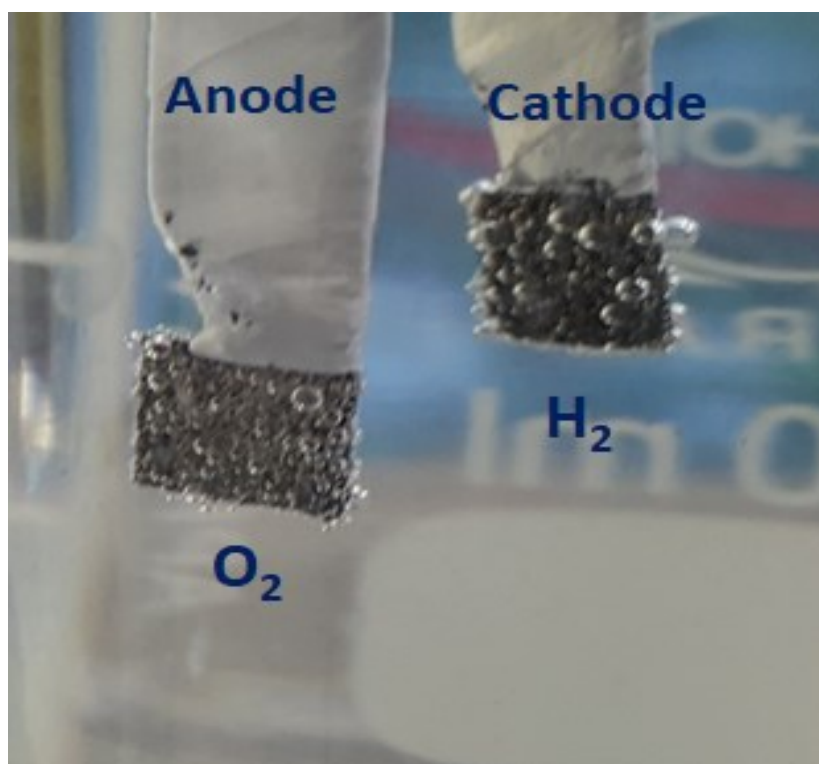

**Table S1. Overall water splitting cell voltage and durability comparison with recently reported works.**

| Catalyst                              | Support                     | Electrolyte Cell     | Cell Voltage<br>@<br>10 mA cm <sup>-2</sup><br>[V] | Durability<br>@<br>10 mA cm <sup>-2</sup><br>[h] | Ref                                                         |
|---------------------------------------|-----------------------------|----------------------|----------------------------------------------------|--------------------------------------------------|-------------------------------------------------------------|
| Ni@Fe-NP                              | GC<br>Ni foam               | 0.1 M KOH<br>1 M KOH | 1.59                                               | 18                                               | This work                                                   |
|                                       |                             |                      | 1.49                                               | 150                                              |                                                             |
| Core-shell<br>Co@NC-600               | GC<br>Ni foam               | 0.1 M KOH<br>1 M KOH | 1.60                                               | 16                                               | <b>Adv. Energy Mater.</b><br>2018, 1702838                  |
|                                       |                             |                      | 1.57                                               | 350                                              |                                                             |
| NiCo <sub>2</sub> O <sub>4</sub>      | Ni foam                     | 1 M KOH              | 1.65                                               | 15                                               | <b>Angew. Chem.</b><br><b>Int. Ed.</b> 2016, 55, 6290.      |
| CoFe LDH-F                            | Ni foam                     | 1 M KOH              | 1.63                                               | -                                                | <b>ACS Appl. Mater.</b><br><b>Interfaces</b> 2016, 8, 34474 |
| NiFe/NiCo <sub>2</sub> O <sub>4</sub> | Ni foam                     | 1 M KOH              | 1.67                                               | 10                                               | <b>Adv. Funct. Mater.</b><br>2016, 26, 3515–3523            |
| Fe-P<br>nanotube                      | Carbon<br>cloth             | 1 M KOH              | 1.69                                               | 14                                               | <b>Chem. Eur. J.</b><br>2015, 21, 18062                     |
| Co <sub>0.85</sub> Se/NiFe-<br>LDH    | Exfoliated<br>graphene foil | 1 M KOH              | 1.67                                               | 10                                               | <b>Energy Environ.</b><br><b>Sci.</b> 2016, 9, 478.         |
